# Supplementary material for: Large excited state two photon absorptions in the near infrared region of surprisingly stable radical cations of (ferrocenyl)indenes
Source: Royal Society of Chemistry journal article supplement (doi:10.1039/c3cp51257f), 2013-01-01

## Supplementary information:

### Excited State Two Photon Absorption in the Near Infrared of Surprisingly stable Radical Cations of (Ferrocenyl)indenes

Laura Orian, Stefano Scuppa,, Saverio Santi and Moreno Meneghetti\*

Department of Chemical Sciences, University of Padova, Via Marzolo 1, I-I-35131 Padova, Italy

**Table S1.** Calculated excitation energies (eV) for  $1^+$  and  $1-6\text{CH}_3^+$  in DCM, oscillator strengths ( $f$ ) and contribution of mono-electronic transitions (above 10%).

| $1^+$  |        |          | $1-6\text{CH}_3^+$                                             |         |           |                                                                                                       |
|--------|--------|----------|----------------------------------------------------------------|---------|-----------|-------------------------------------------------------------------------------------------------------|
| E (eV) | $f$    |          | E (eV)                                                         | $F$     |           |                                                                                                       |
| 1      | 1.0184 | 0.348e-1 | 77 $\beta$ →78 $\beta$ (87%)                                   | 0.96057 | 0.351e-1  | 101 $\beta$ →102 $\beta$ (76%)<br>99 $\beta$ →102 $\beta$ (20%)                                       |
| 2      | 1.0300 | 0.218e-3 | 75 $\beta$ →78 $\beta$ (97%)                                   | 1.0889  | 0.498e-3  | 98 $\beta$ →102 $\beta$ (90%)                                                                         |
| 3      | 1.2278 | 0.234e-1 | 76 $\beta$ →78 $\beta$ (87%)                                   | 1.1697  | 0.416e-01 | 101 $\beta$ →102 $\beta$ (19%)<br>99 $\beta$ →102 $\beta$ (69%)<br>97 $\beta$ →102 $\beta$ (71%)      |
| 4      | 1.5346 | 0.240e-3 | 74 $\beta$ →78 $\beta$ (97%)                                   | 1.9495  | 0.299e-01 | 96 $\beta$ →102 $\beta$ (25%)<br>97 $\beta$ →102 $\beta$ (23%)                                        |
| 5      | 2.0050 | 0.938e-3 | 73 $\beta$ →78 $\beta$ (100%)                                  | 1.9686  | 0.114e-01 | 96 $\beta$ →102 $\beta$ (75%)                                                                         |
| 6      | 2.1489 | 0.846e-2 | 72 $\beta$ →78 $\beta$ (94%)                                   | 2.3170  | 0.282e-02 | 95 $\beta$ →102 $\beta$ (96%)<br>94 $\beta$ →102 $\beta$ (56%)                                        |
| 7      | 2.4240 | 0.104    | 78 $\alpha$ →79 $\alpha$ (69%)<br>77 $\beta$ →79 $\beta$ (19%) | 2.4709  | 0.682e-01 | 102 $\alpha$ →103 $\alpha$ (32%)<br>94 $\beta$ →102 $\beta$ (40%)                                     |
| 8      | 2.5090 | 0.137e-1 | 71 $\beta$ →78 $\beta$ (88%)                                   | 2.4745  | 0.933e-01 | 102 $\alpha$ →103 $\alpha$ (43%)<br>101 $\beta$ →103 $\beta$ (36%)<br>93 $\alpha$ →102 $\alpha$ (26%) |
| 9      | 2.5315 | 0.272e-2 | 70 $\beta$ →78 $\beta$ (90%)                                   | 2.7909  | 0.233e-01 | 102 $\alpha$ →104 $\alpha$ (18%)                                                                      |
| 10     | 2.7409 | 0.892e-4 | 78 $\alpha$ →80 $\alpha$ (95%)                                 | 2.8143  | 0.715e-02 | 102 $\alpha$ →104 $\alpha$ (80%)                                                                      |

|    |        |           |               |        |           |                 |  |
|----|--------|-----------|---------------|--------|-----------|-----------------|--|
|    |        |           | 77β→79β (47%) |        |           |                 |  |
|    |        |           | 76α→79α (15%) |        |           |                 |  |
|    |        |           | 78α→79α (11%) |        |           | 101α→103α (44%) |  |
| 11 | 2.9252 | 0.120     | 76β→79β (11%) | 2.9135 | 0.467e-01 | 93β→102β (28%)  |  |
|    |        |           | 76β→79β (44%) |        |           |                 |  |
|    |        |           | 76α→79α (23%) |        |           | 100α→103α (37%) |  |
| 12 | 3.0210 | 0.351e-1  | 78α→81α (12%) | 2.9279 | 0.155e-01 | 100β→103β (36%) |  |
|    |        |           | 75β→79β (55%) |        |           | 101α→103α (43%) |  |
|    |        |           | 75α→79α (39%) |        |           | 93β→102β (17%)  |  |
| 13 | 3.0579 | 0.972e-4  |               | 2.9321 | 0.357e-01 | 100α→103α (11%) |  |
|    |        |           |               |        |           | 100β→103β (11%) |  |
| 14 | 3.1765 | 0.108e-2  | 77α→79α (92%) | 2.9801 | 0.193e-01 | 92β→102β (80%)  |  |
|    |        |           |               |        |           | 99α→103α (30%)  |  |
| 15 | 3.2278 | 0.193e-1  | 69β→78β (85%) | 3.0004 | 0.189e-01 | 99β→103β (38%)  |  |
| 16 | 3.2620 | 0.238e-3  | 68β→78β (99%) | 3.1310 | 0.424e-02 | 91β→102β (99%)  |  |
|    |        |           | 77β→80β (69%) |        |           | 99α→104α (17%)  |  |
| 17 | 3.2876 | 0.880e-4  | 76α→80α (20%) | 3.2299 | 0.384e-02 | 101β→104β (69%) |  |
|    |        |           |               |        |           | 102α→105α (32%) |  |
|    |        |           | 77β→81β (33%) |        |           | 98α→103α (22%)  |  |
| 18 | 3.3696 | 0.104     | 78α→81α (32%) | 3.2624 | 0.358e-01 | 101β→105β (18%) |  |
|    |        |           | 76α→79α (48%) |        |           |                 |  |
| 19 | 3.3941 | 0.599e-2  | 76β→79β (29%) | 3.3185 | 0.431e-02 | 98β→103β (82%)  |  |
|    |        |           | 75α→80α (30%) |        |           | 100α→104α (25%) |  |
|    |        |           | 75β→80β (27%) |        |           | 100β→103β (15%) |  |
| 20 | 3.4599 | 0.270e-2  | 76β→80β (12%) | 3.3270 | 0.189e-02 | 100β→104β (31%) |  |
|    |        |           |               |        |           | 100α→104α (26%) |  |
|    |        |           | 75β→80β (19%) |        |           | 100α→104α (22%) |  |
|    |        |           | 75α→80α (19%) |        |           | 100β→103β (22%) |  |
| 21 | 3.4679 | 0.456e-03 | 75α→79α (19%) | 3.3348 | 0.263e-02 | 100β→104β (22%) |  |
|    |        |           | 75α→79α (21%) |        |           |                 |  |
|    |        |           | 76β→80β (17%) |        |           | 99α→103α (34%)  |  |
|    |        |           | 76α→80α (15%) |        |           | 99β→103β (30%)  |  |
| 22 | 3.5104 | 0.256e-03 | 75β→79β (14%) | 3.3560 | 0.207e-01 | 102α→105α (11%) |  |
| 23 | 3.5843 | 0.115e-02 | 74α→79α (80%) | 3.4129 | 0.659e-04 | 101α→104α (34%) |  |
|    |        |           |               |        |           | 99β→104β (32%)  |  |
|    |        |           |               |        |           | 99α→104α (18%)  |  |
|    |        |           |               |        |           | 98α→104α (16%)  |  |
| 24 | 3.6015 | 0.387e-04 | 67β→78β (99%) | 3.4523 | 0.714e-02 | 98α→103α (12%)  |  |
|    |        |           |               |        |           | 98α→103α (46%)  |  |
| 25 | 3.6232 | 0.193e-02 | 77α→80α (96%) | 3.4660 | 0.419e-01 | 101β→105β (11%) |  |
| 26 | 3.6286 | 0.149e-01 | 73α→79α (75%) | 3.5258 | 0.841e-03 | 90β→102β (97%)  |  |
| 27 | 3.6713 | 0.210e-02 | 74β→79β (90%) | 3.5718 | 0.182e-02 | 89β→102β (11%)  |  |
|    |        |           |               |        |           | 101β→105β (28%) |  |
|    |        |           |               |        |           | 96α→103α (23%)  |  |
|    |        |           |               |        |           | 97α→103α (21%)  |  |
| 28 | 3.7757 | 0.639e-01 | 72α→79α (71%) | 3.6867 | 0.892e-01 | 102α→105α (14%) |  |

**Fig. S1.** Comparison of the linear optical spectra of the solutions of  $1^+$  and  $1-6\text{CH}_3^+$  before (red line) and after (black line) NLT measurements did not reveal photodegradation and this is evidence of the very high stability of these radical cations (complete spectra are shown on the left, spectra details in proximity of the wavelength of irradiation are shown on the right).

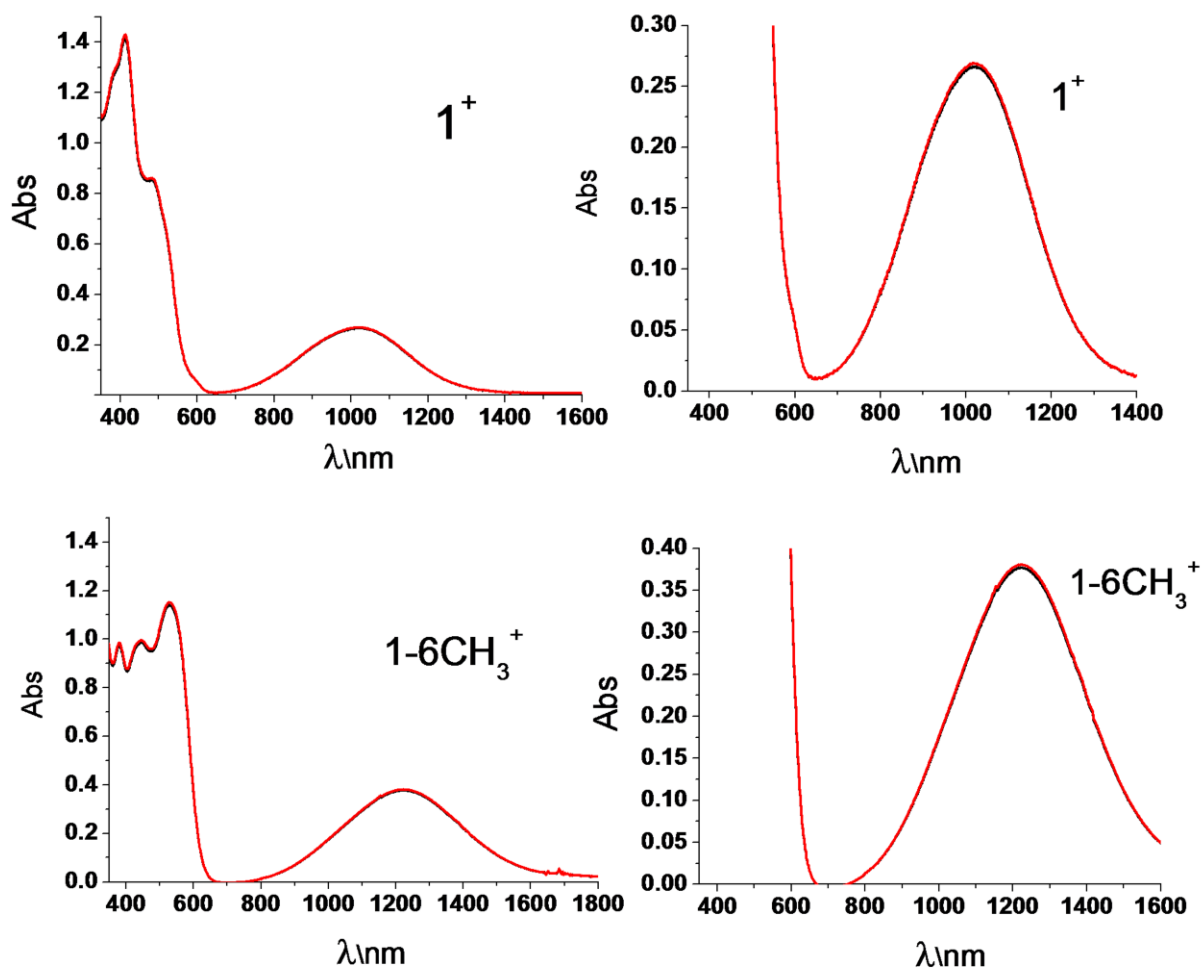

Supplement: c3cp51257f.pdf [file c3cp51257f.pdf]
